# Supplementary material
Source: PubMed Central journal article supplement (PMC5453699)
Supplement: jciinsight-2-90853-s001.pdf [file jciinsight-2-90853-s001.pdf]

## **Long-Term Culture of Human Liver Tissue with Advanced Hepatic Functions**

Soon Seng Ng, Anming Xiong, Khanh Nguyen, Marilyn Masek, Da Yoon No, Menashe Elazar, Eyal Shteyer, Mark A. Winters, Amy Voedisch, Kate Shaw, Sheikh Tamir Rashid, Curtis W. Frank, Nam Joon Cho, Jeffrey S. Glenn

### **Supplementary Figure Legends**

**Supplementary Figure 1.** ICC scaffold demonstrates uniform porosity and porous structure across z-axis.

**Supplementary Figure 2.** Surface functionalization of ICC scaffolds with type I collagen.

**Supplementary Figure 3.** HepG2 cells do not exhibit significant CYP activity compared to primary liver cells, while FTLC in Col I-ICC scaffolds maintain drug metabolizing activity for months.

**Supplementary Figure 4.** Col-ICC facilitates the maturation of adult liver metabolic activities.

**Supplementary Figure 5.** Infection of ICC cultures with cell culture-produced HCVcc genotype 2a. The engineered liver tissue supports the full life cycle of J6/JFH1 HCV genotype 2a (HCVcc) infection.

**Supplementary Table 1.** Comparison of the presently described ICC system with current state-of-the-art *in vitro* liver models based on primary human cells.

**Supplementary Figure 1.** ICC scaffold demonstrates uniform porosity and porous structure across the z-axis. Fluorescein-conjugated-PEG was incorporated into ICC to enable confocal microscopic imaging. Uniform pore size, 3D hexagonal arrangement and high-interconnected windows were observed across 4 tiers of ICCs that span across 240  $\mu\text{m}$  in z-axis.

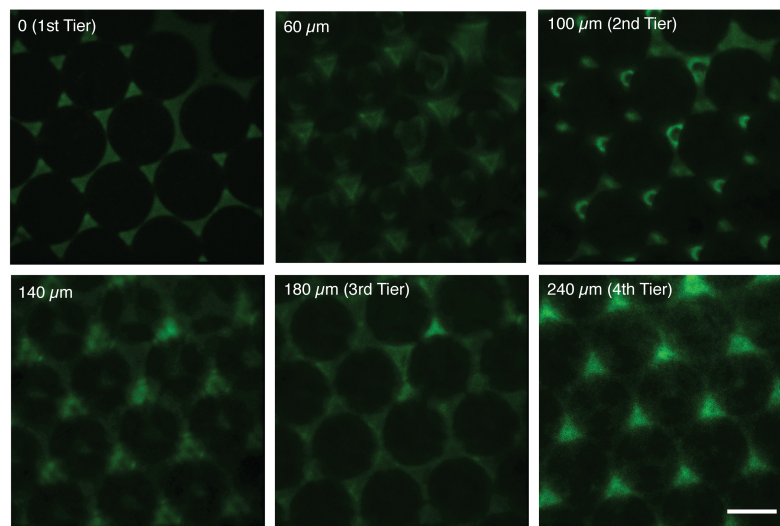

**Supplementary Figure 2.** Surface functionalization of ICC scaffolds with type I collagen. **(A)** 10 wt.% of N-hydroxysuccinimide (Acrylate-PEG-NHS) was incorporated into diacrylate-PEG (PEG-DA) to provide amine-reactive ligand for type I collagen (Col) conjugation. **(B)** HUVECs transduced with lentiviral EGFP reporter were seeded into Col-I ICC and reached confluence in 1 day post-seeding, whereas minimal cell attachment was observed on Naked ICC (scale bar, 100  $\mu$ m). **(C)** EGFP-HUVECs established a confluent morphology across multiple tiers in ICCs 1 day post-seeding, as demonstrated by confocal microscopy (scale bar, 100  $\mu$ m). Statistical significance was analyzed by one-way ANOVA with Tukey's post test: \*\*  $p < 0.005$ , \*\*\*  $p < 0.0005$ , \*\*\*\*  $p < 0.0001$ , N.D. none detected.

**A**

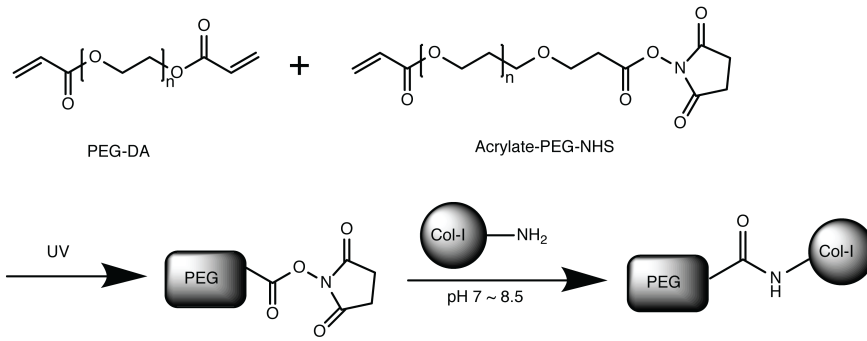

**B**

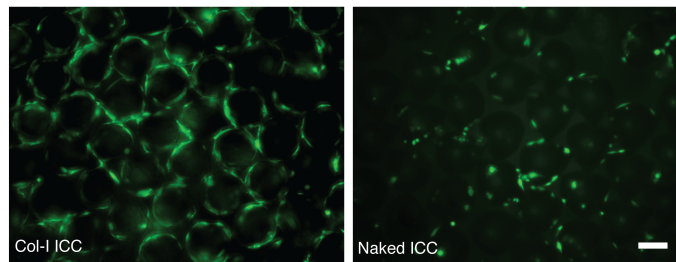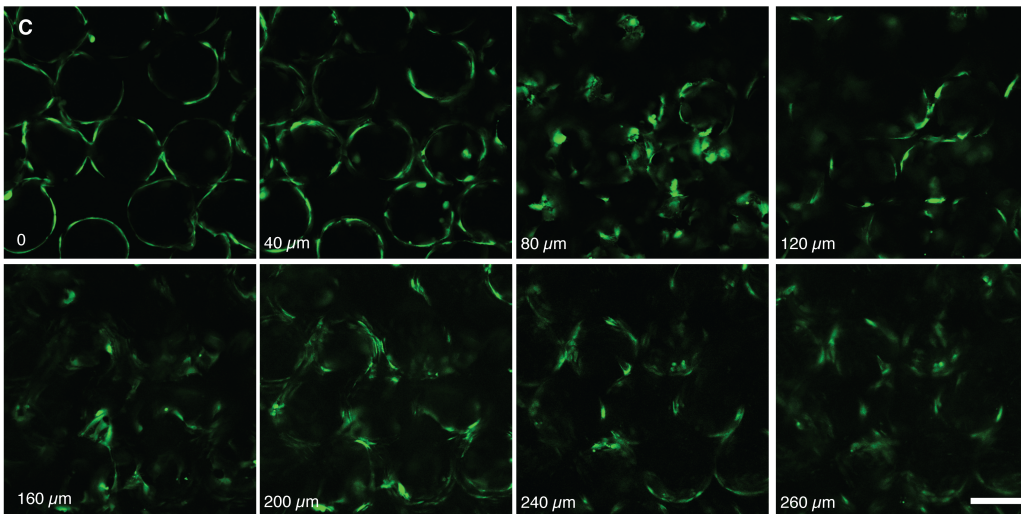

**Supplementary Figure 3.** HepG2 cells do not exhibit significant CYP activity compared to primary liver cells, while FTLC in ICC-Col I scaffolds maintain drug metabolizing activity for months. **(A)** Freshly isolated FTLCs in different platforms and HepG2 on 2D tissue culture plates were treated with Clemizole. Supernatants were collected at 2, 4 and 24 hours to monitor the production of M1 metabolites, n=3. **(B)** Long-term preservation of metabolic function was assessed by the production of clemizole M1 metabolite. FTLCs in Col-I ICC were treated with Clemizole for overnight at day 0, 85 and 112, 133 and 148 post-seeding, and assayed for M1 metabolite with LC/MS. Results were normalized against freshly isolated FTLC (day 0 value), n=4. **(C)** Long term expression of hepatocyte markers in the ICC cultures. RT-qPCR assays for hepatocyte-specific markers (ALB, CYP2E1, CYP3A4) performed up to 7 weeks post seeding in ICC vs. standard 2D cultures. Statistical significance was analyzed by unpaired t test two-tailed: \*  $p < 0.05$ , \*\*  $p < 0.01$ , \*\*\*  $p < 0.005$ , \*\*\*\*  $p < 0.0005$ , N.D. none detected.

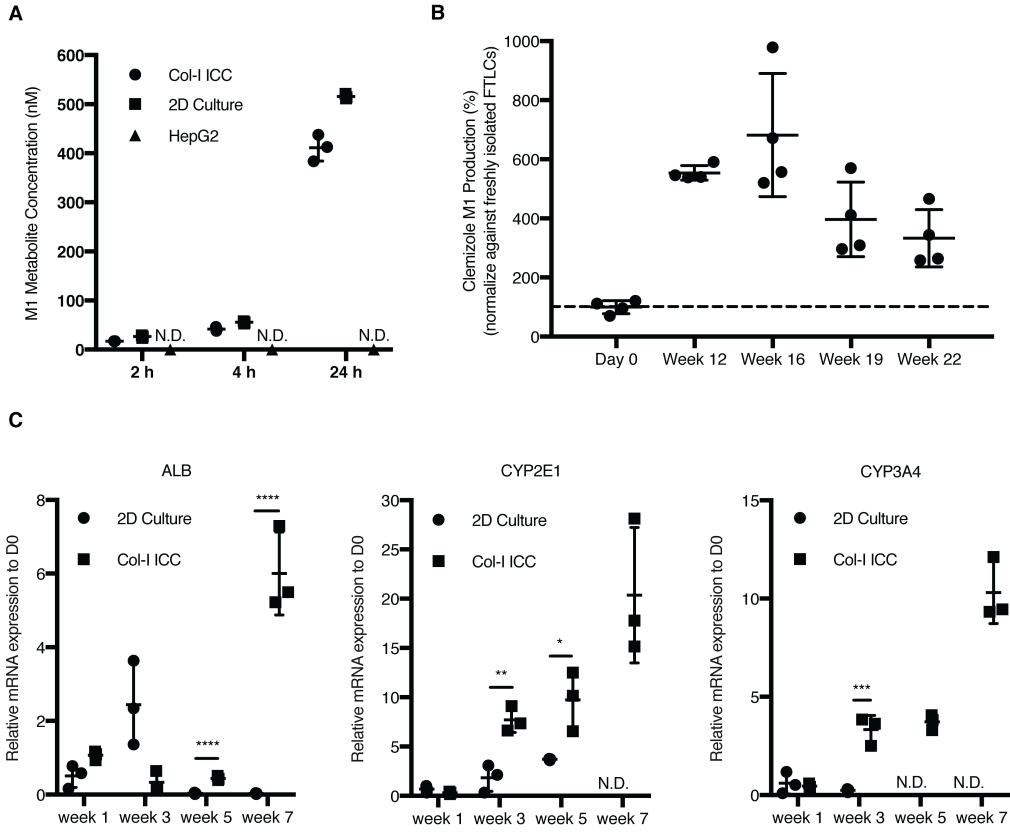

**Supplementary Figure 4.** Col-I ICC facilitates the maturation of adult liver metabolic activities. Cultures of FTLCs in Col-I ICC, FTLCs in standard 2D culture, or cryopreserved primary adult human hepatocytes in standard 2D culture were treated overnight with debrisoquine, s-mephenytion and clemizole at the indicated time points. The production of these compounds' major metabolites was then measured. **(A)** debrisoquine 4-OH metabolite generated from debrisoquine by CYP2D6 metabolism, n=4. **(B)** s-mephenytoin 4-OH metabolite generated from mephenytoin by CYP2C19 metabolism, n=4. **(C)** clemizole M1 metabolite generated from clemizole by CYP3A4 metabolism, n=3. N.D. none detected.

**A**

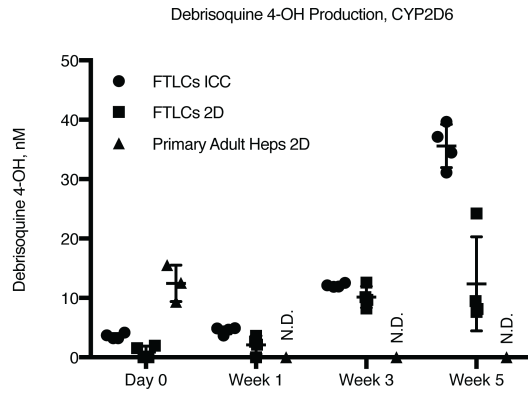

**B**

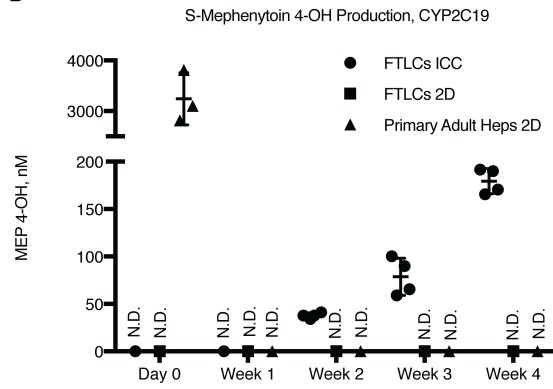

**C**

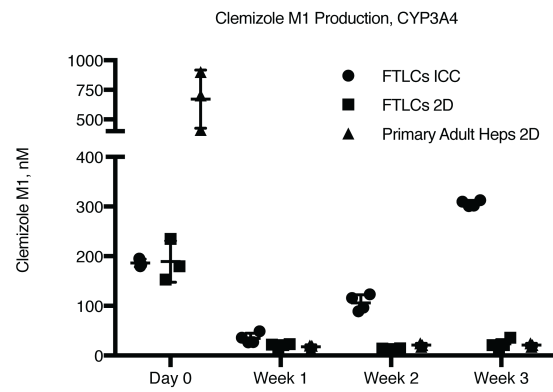



**Supplementary Figure 5.** Infection of ICC cultures with cell culture produced HCVcc genotype 2a. Human engineered liver supports full life cycle of J6/JFH1 HCV genotype 2a (HCVcc) infection. **(A)** Experimental set up for infection with HCVcc. FTLCs in ICC were inoculated with HCVcc at Day 9 post-seeding. At 4 h post-inoculation, virus was removed, cultures were washed five times with PBS and fresh medium was added; media samples were collected pre- and post-wash at the interval of 2 or 3 days. At Day 14 post-inoculation, cultures were terminated and intracellular RNA was extracted for analysis. **(B)** RT-qPCR HCV RNA results collected from the pre- and post-wash of HCVcc inoculated cultures demonstrate persistent HCV production in FTLCs Co-I ICC. **(C)** Parallel sets of cultures were treated with vehicle control or 50 unit/ml of interferon alpha (IFNa) from Day 1 post-inoculation. At Day 14 post-inoculation, IFNa treatment eradicated detectable HCV in both extra- and intracellular samples, n=3. N.D. none detected.

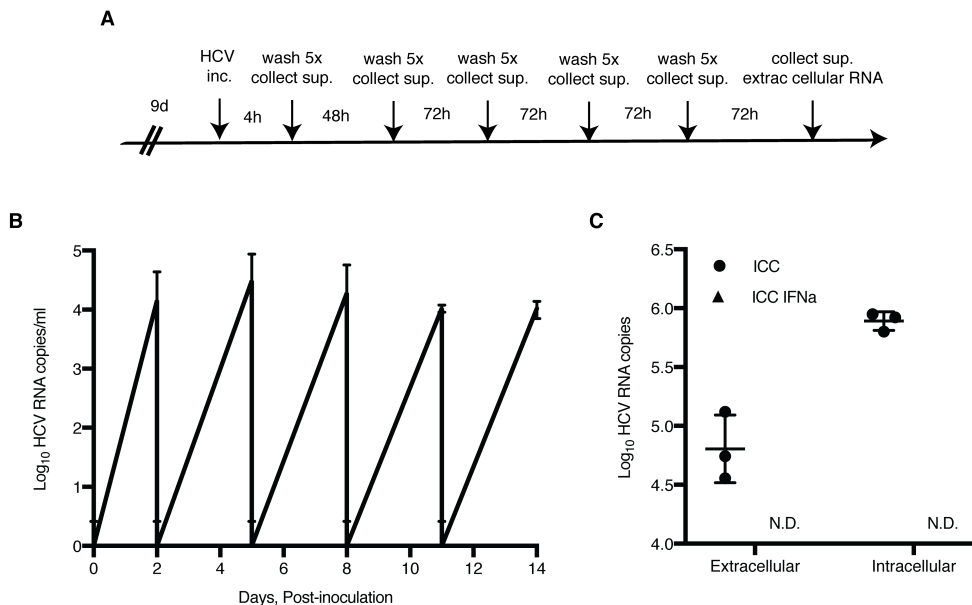

**Supplementary Table 1.** Comparison of the presently described ICC system with current state-of-the-art *in vitro* liver models based on primary human cells. An abundance of *in vitro* liver model systems have been reported in recent decades. However, many of such systems use liver cancer cell lines or immortalized hepatic cell lines, which often have lost key markers of their former differentiated state. As such, the gold standard for recapitulating advanced hepatic functions in culture systems remains human primary hepatocytes. In this table, we compare the ICC system with other liver cell cultures that only use human primary cells. To our knowledge, there are about 20 such reports. In particular, we compared the long-term performance *in vitro*, e.g., how long the culture systems can support a hepatic phenotype (e.g. albumin production, liver-specific protein expression, etc.); how long they can maintain drug metabolism capability; and whether they can support HCV infection, and whether the infection is mediated by cell culture-derived HCV (HCVcc) or natural patient inoculums of HCV (in general, the use of HCV patient sera is considered more physiologically relevant than using HCVcc). Based on these specifications, the ICC system demonstrates superior features to the other systems in nearly all performance criteria. The ICC system has the potential to serve as a scalable platform for studies of long-term human-specific drug metabolism and toxicities, as well as to provide a highly capable liver model that simultaneously supports virus infection and testing of antiviral drugs.

| <b>Platform</b>                                 | <b>Cell source</b>                | <b>Hepatic phenotype</b> | <b>Drug metabolism</b> | <b>HCV infection</b> | <b>Reference</b> |
|-------------------------------------------------|-----------------------------------|--------------------------|------------------------|----------------------|------------------|
| ECM-functionalized 3D ICC scaffold              | Fetal total liver cells (16-22 w) | > 5 months               | > 5 months             | HCV patient sera     | This study       |
| Micropatterning co-culture                      | Adult hepatocyte, iPS             | 2-6 weeks                | 6 weeks                | HCVcc                | <sup>1-3</sup>   |
| Collagen sandwich                               | Adult hepatocyte                  | 2 weeks                  | 2 weeks                | N.A.                 | <sup>4</sup>     |
| Hyaluronic acid with liver ECM extract          | Adult hepatocyte                  | 4 weeks                  | 4 weeks                | N.A.                 | <sup>5</sup>     |
| Spheroid in bioreactor                          | Adult hepatocyte                  | 3-4 weeks                | 4 weeks                | N.A.                 | <sup>6</sup>     |
| Microfluidic chip with endothelial-like barrier | Adult hepatocyte                  | 7 days                   | < 7 days               | N.A.                 | <sup>7</sup>     |
| Decellularized organ                            | Fetal liver cell (17-21 w)        | 7 days                   | N.A.                   | N.A.                 | <sup>8</sup>     |
| Cell sheet                                      | Adult hepatocyte                  | 3 days                   | 3 days                 | N.A.                 | <sup>9</sup>     |
| Nanopillar plate                                | iPS/ES                            | 5 weeks                  | 5 weeks                | N.A.                 | <sup>10</sup>    |
| Perfusion-based microfluidic chip               | Adult hepatocyte                  | 7 days                   | N.A.                   | N.A.                 | <sup>11</sup>    |
| HepaChip <sup>R</sup>                           | Adult hepatocyte                  | 3 days                   | 3 days                 | N.A.                 | <sup>12</sup>    |
| 2D collagen matrix                              | Adult hepatocyte                  | 3 weeks                  | N.A.                   | HCV patient sera     | <sup>13</sup>    |
| Alginate microencapsulation                     | Adult hepatocyte                  | 7 days                   | 3 days                 | N.A.                 | <sup>14</sup>    |

|                        |                            |            |      |                  |                  |
|------------------------|----------------------------|------------|------|------------------|------------------|
| Hepatosphere           | Adult hepatocyte           | 20 days    | N.A. | N.A.             | <sup>15</sup>    |
| Collagen-I plate       | Fetal liver cell (16-24 w) | 4 weeks    | N.A. | HCVcc            | <sup>16</sup>    |
| Perfusion bioreactor   | Fetal liver cell (17-20 w) | 10 days    | N.A. | N.A.             | <sup>17</sup>    |
| Conditioned 2D culture | Fetal hepatocyte (8-17 w)  | > 4 months | N.A. | HCV patient sera | <sup>18,19</sup> |

### Supplementary References

- 1 Ploss, A. et al. Persistent hepatitis C virus infection in microscale primary human hepatocyte cultures. *Proceedings of the National Academy of Sciences*, doi:10.1073/pnas.0915130107 (2010).
- 2 Schwartz, R. E. et al. Modeling hepatitis C virus infection using human induced pluripotent stem cells. *Proceedings of the National Academy of Sciences of the United States of America* 109, 2544-2548, doi:10.1073/pnas.1121400109 (2012).
- 3 Khetani, S. R. & Bhatia, S. N. Microscale culture of human liver cells for drug development. *Nature Biotechnology* 26, 120-126, doi:10.1038/nbt1361 (2008).
- 4 Kern, A., Bader, A., Pichlmayr, R. & Sewing, K. F. Drug metabolism in hepatocyte sandwich cultures of rats and humans. *Biochemical pharmacology* 54, 761-772 (1997).

- 5 Skardal, A. et al. Tissue specific synthetic ECM hydrogels for 3-D in vitro maintenance of hepatocyte function. *Biomaterials* 33, 4565-4575, doi:10.1016/j.biomaterials.2012.03.034 (2012).
- 6 Tostoes, R. M. et al. Human liver cell spheroids in extended perfusion bioreactor culture for repeated-dose drug testing. *Hepatology* 55, 1227-1236, doi:10.1002/hep.24760 (2012).
- 7 Lee, P. J., Hung, P. J. & Lee, L. P. An artificial liver sinusoid with a microfluidic endothelial-like barrier for primary hepatocyte culture. *Biotechnology and bioengineering* 97, 1340-1346, doi:10.1002/bit.21360 (2007).
- 8 Baptista, P. M. et al. The use of whole organ decellularization for the generation of a vascularized liver organoid. *Hepatology* 53, 604-617, doi:10.1002/hep.24067 (2011).
- 9 Ohashi, K. et al. Engineering functional two- and three-dimensional liver systems in vivo using hepatic tissue sheets. *Nature medicine* 13, 880-885, doi:10.1038/nm1576 (2007).
- 10 Takayama, K. et al. 3D spheroid culture of hESC/hiPSC-derived hepatocyte-like cells for drug toxicity testing. *Biomaterials* 34, 1781-1789, doi:10.1016/j.biomaterials.2012.11.029 (2013).
- 11 Goral, V. N. et al. Perfusion-based microfluidic device for three-dimensional dynamic primary human hepatocyte cell culture in the absence of biological or synthetic matrices or coagulants. *Lab on a chip* 10, 3380-3386, doi:10.1039/c0lc00135j (2010).

- 12 Schutte, J. et al. "Artificial micro organs"--a microfluidic device for dielectrophoretic assembly of liver sinusoids. *Biomedical microdevices* 13, 493-501, doi:10.1007/s10544-011-9517-7 (2011).
- 13 Buck, M. Direct infection and replication of naturally occurring hepatitis C virus genotypes 1, 2, 3 and 4 in normal human hepatocyte cultures. *PloS one* 3, e2660, doi:10.1371/journal.pone.0002660 (2008).
- 14 Jitraruch, S. et al. Alginate microencapsulated hepatocytes optimised for transplantation in acute liver failure. *PLoS One* 9, e113609, doi:10.1371/journal.pone.0113609 (2014).
- 15 Khaoustov, V. I. et al. Induction of three-dimensional assembly of human liver cells by simulated microgravity. *In vitro cellular & developmental biology. Animal* 35, 501-509, doi:10.1007/s11626-999-0060-2 (1999).
- 16 Andrus, L. et al. Expression of Paramyxovirus V Proteins Promotes Replication and Spread of Hepatitis C Virus in Cultures of Primary Human Fetal Liver Cells. *Hepatology* 54, 1901-1912, doi:10.1002/hep.24557 (2011).
- 17 Schmelzer, E. et al. Three-Dimensional Perfusion Bioreactor Culture Supports Differentiation of Human Fetal Liver Cells. *Tissue Engineering Part A* 16, 2007-2016, doi:10.1089/ten.tea.2009.0569 (2010).
- 18 Lazaro, C. A. et al. Hepatitis C virus replication in transfected and serum-infected cultured human fetal hepatocytes. *Am J Pathol* 170, 478-489, doi:10.2353/ajpath.2007.060789 (2007).

- 19 Lázaro, C. A. et al. Establishment, characterization, and long-term maintenance of cultures of human fetal hepatocytes. *Hepatology* 38, 1095-1106, doi:10.1053/jhep.2003.50448 (2003).
